# Supplementary material for: Antibacterial textiles functionalized by layer-by-layer assembly of polyelectrolytes and TiO2photocatalyst
Source: Royal Society of Chemistry journal article supplement (doi:10.1039/c5ra05541e), 2015-01-01
Supplement: c5ra05541e1.pdf [file c5ra05541e1.pdf]

## Antibacterial textiles functionalized by layer-by-layer assembly of polyelectrolytes and TiO<sub>2</sub> photocatalyst

Gaëlle Carré,<sup>ab\*</sup> Laurent Garnier,<sup>b</sup> Janina Moeller-Siegert,<sup>a</sup> Jean-Pierre Gies,<sup>b</sup> Valérie Keller,<sup>a</sup> Philippe Andre,<sup>b</sup> and Nicolas Keller,<sup>a\*</sup>

<sup>a</sup> Institut de Chimie et Procédés pour l'Énergie, l'Environnement et la Santé (ICPEES), CNRS and Strasbourg University, 25 rue Becquerel, 67087 Strasbourg Cedex, France. \* Email : nkeller@unistra.fr

<sup>b</sup> Laboratoire de Biophotonique et Pharmacologie, CNRS and Strasbourg University, 74 route du Rhin, 67400 Illkirch, France.

### Supporting Information S1

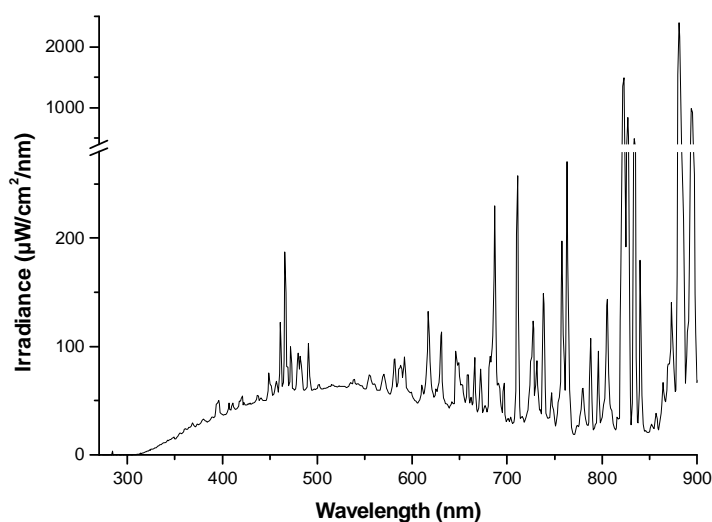

**Supporting Information S1.** Spectral distribution of the irradiance received by the textiles, measured using a wideband RPS900-W Rapid Portable Spectroradiometer from ILT. The total UV/Vis irradiance of 242 W/m<sup>2</sup> contained 226 W/m<sup>2</sup> of visible light and 16 W/m<sup>2</sup> of UV-A.
